# Supplementary material
Source: Springer Nature journal article supplement (https://www.springermedizin.de/resource/supplementary/13058_2010_9465_MOESM14_ESM.pdf/9702232)
Supplement: MOESM14 [file 9702232]

**Table 3. Expression correlation of miRNAs and inversely expressed predicted targets.**

| microRNA expression |                                       | Gene expression |                                                                                 |             | miRNA:mRNA             |                      |
|---------------------|---------------------------------------|-----------------|---------------------------------------------------------------------------------|-------------|------------------------|----------------------|
| miRNA               | Fold Change                           | Probe ID        | Gene Symbol-Gene Name                                                           | Fold Change | Expression correlation | p-value <sup>a</sup> |
| <b>let-7c</b>       | 0.03                                  | 203481_at       | C10ORF6-chromosome 10 open reading frame 6                                      | 1.58        | -0.58                  | 1.88E-02             |
|                     |                                       | 218567_x_at     | DPP3-dipeptidyl-peptidase 3                                                     | 2.31        | -0.49                  | 5.4E-02              |
|                     |                                       | 203358_s_at     | EZH2-enhancer of zeste homolog 2 ( <i>Drosophila</i> )                          | 2.36        | -0.64                  | 7.69E-03             |
|                     |                                       | 209283_at       | SLC20A1-solute carrier family 20 (phosphate transporter), member 1              | 2.06        | -0.30                  | 2.53E-01             |
|                     |                                       | 203358_s_at     | TRIB1-tribbles homolog 1 ( <i>Drosophila</i> )                                  | 1.77        | -0.48                  | 5.84E-02             |
| <b>miR-10b</b>      | 0.04                                  | 202357_s_at     | SDC1-syndecan 1                                                                 | 2.06        | -0.28                  | 2.96E-01             |
| <b>miR-125b</b>     | 0.05                                  | 203744_at       | HMGB3-high-mobility group box 3                                                 | 2.13        | -0.61                  | 1.27E-02             |
|                     |                                       | 209613_s_at     | NR1P1-nuclear receptor interacting protein 1                                    | 2.25        | -0.39                  | 1.36E-01             |
|                     |                                       | 213004_at       | MEMO1-mediator of cell motility 1                                               | 1.73        | -0.59                  | 1.54E-02             |
| <b>miR-17-3p</b>    | 0.12                                  | 203744_at       | HMGB3-high-mobility group box 3                                                 | 2.13        | -0.49                  | 5.66E-02             |
|                     |                                       | 212446_s_at     | LASS6-LAG1 longevity assurance homolog 6                                        | 1.78        | -0.31                  | 2.38E-01             |
|                     |                                       | 211653_x_at     | MAP7-microtubule-associated protein 7                                           | 1.73        | -0.49                  | 5.19E-02             |
|                     |                                       | 213492_at       | SERP1-stress-associated endoplasmic reticulum protein 1                         | 1.80        | -0.23                  | 3.84E-01             |
|                     |                                       | 203213_at       | SAR1B-SAR1 gene homolog B ( <i>S. cerevisiae</i> )                              | 1.95        | -0.07                  | 8.03E-01             |
|                     |                                       | 202381_at       | ADAM9-ADAM metalloproteinase domain 9                                           | 2.04        | -0.45                  | 7.89E-02             |
| <b>miR-181b</b>     | 5.46                                  | 221234_s_at     | BACH2-BTB and CNC homology 1 basic leucine zipper transcription factor 2        | 0.47        | -0.30                  | 2.62E-01             |
|                     |                                       | 212914_at       | CBX7-chromobox homolog 7                                                        | 0.44        | -0.30                  | 2.67E-01             |
|                     |                                       | 204753_s_at     |                                                                                 | 0.24        | -0.19                  | 4.84E-01             |
|                     |                                       | 204755_x_at     | HLF-hepatic leukemia factor                                                     | 0.28        | -0.52                  | 3.82E-02             |
|                     |                                       | 204754_at       |                                                                                 | 0.31        | -0.45                  | 7.70E-02             |
|                     |                                       | 204567_s_at     | NMT2-N-myristoyltransferase 2                                                   | 0.58        | -0.35                  | 1.81E-01             |
|                     |                                       | 202274_at       | NR3C1-nuclear receptor subfamily 3, group C, member 1 (glucocorticoid receptor) | 0.46        | -0.44                  | 8.86E-02             |
| <b>miR-182</b>      | 72.35                                 | 221234_s_at     | BACH2-BTB and CNC homology 1 basic leucine zipper transcription factor 2        | 0.47        | -0.73                  | 1.41E-03             |
|                     |                                       | 210347_s_at     |                                                                                 | 0.27        | -0.65                  | 6.31E-03             |
|                     |                                       | 219497_s_at     | BCL11A-B-cell CLL/lymphoma 11A                                                  | 0.42        | -0.69                  | 2.86E-03             |
|                     |                                       | 219498_s_at     |                                                                                 | 0.43        | -0.80                  | 2.19E-04             |
|                     |                                       | 221530_s_at     | BHLHB3-basic helix-loop-helix domain containing, class B, 3                     | 0.47        | -0.55                  | 2.71E-02             |
|                     |                                       | 204851_s_at     |                                                                                 | 0.13        | -0.83                  | 7.48E-05             |
|                     |                                       | 204850_s_at     | DCX-doublecortin; lissencephaly, X-linked (doublecortin)                        | 0.30        | -0.67                  | 4.63E-03             |
|                     |                                       | 209691_s_at     | DOK4-docking protein 4                                                          | 0.56        | -0.53                  | 3.65E-02             |
|                     |                                       | 209905_at       |                                                                                 | 0.10        | -0.64                  | 8.18E-03             |
|                     |                                       | 214651_s_at     | HOXA9-homeobox A9                                                               | 0.31        | -0.55                  | 2.63E-02             |
|                     |                                       | 64900_at        | LPHN2-latrophilin 2                                                             | 0.37        | -0.62                  | 9.87E-03             |
|                     |                                       | 219497_s_at     | PRKD1-protein kinase D1                                                         | 0.54        | -0.59                  | 1.61E-02             |
|                     |                                       | 210735_s_at     | RIMS3-regulating synaptic membrane exocytosis 3                                 | 0.52        | -0.73                  | 1.25E-03             |
|                     |                                       | 205022_s_at     | FOXN3-checkpoint repressor 1                                                    | 0.50        | -0.67                  | 4.40E-03             |
|                     |                                       | 221935_s_at     | NCAM1-neural cell adhesion molecule 1                                           | 0.43        | -0.41                  | 1.19E-01             |
| <b>miR-183</b>      | 51.88                                 | 221234_s_at     | BACH2-BTB and CNC homology 1 basic leucine zipper transcription factor 2        | 0.47        | -0.75                  | 7.83E-04             |
|                     |                                       | 204851_s_at     |                                                                                 | 0.13        | -0.82                  | 1.06E-04             |
|                     |                                       | 204850_s_at     | DCX-doublecortin; lissencephaly, X-linked (doublecortin)                        | 0.30        | -0.80                  | 2.16E-04             |
|                     |                                       | 201693_s_at     | EGR1-early growth response 1                                                    | 0.45        | -0.61                  | 1.12E-02             |
|                     |                                       | 202274_at       | NR3C1-nuclear receptor subfamily 3, group C, member 1 (glucocorticoid receptor) | 0.46        | -0.70                  | 2.77E-03             |
| <b>miR-195</b>      | 0.13                                  | 200974_at       |                                                                                 | 0.57        | -0.45                  | 8.08E-02             |
|                     |                                       | 217852_s_at     | ARL8B-ADP-ribosylation factor-like 8B                                           | 1.64        | -0.31                  | 2.49E-01             |
|                     |                                       | 208712_at       | <b>CCND1-cyclin D1</b>                                                          | 2.30        | -0.33                  | 2.19E-01             |
|                     |                                       | 208653_s_at     | CD164-CD164 molecule, sialomucin                                                | 2.40        | -0.54                  | 3.16E-02             |
|                     |                                       | 202596_at       | ENSA-endosulfine alpha                                                          | 2.03        | -0.37                  | 1.54E-01             |
|                     |                                       | 211653_x_at     | MAP7-microtubule-associated protein 7                                           | 1.73        | -0.52                  | 4.00E-02             |
|                     |                                       | 221935_s_at     | RAD23B-RAD23 homolog B                                                          | 1.79        | -0.08                  | 7.61E-01             |
|                     |                                       | 201341_at       | TMEM33-transmembrane protein 33                                                 | 1.62        | -0.30                  | 2.64E-01             |
| <b>miR-204</b>      | 0.08                                  | 212464_s_at     | WWP1-WW domain containing E3 ubiquitin protein ligase 1                         | 2.79        | -0.49                  | 5.57E-02             |
|                     |                                       | 216442_x_at     |                                                                                 | 2.83        | -0.25                  | 5.57E-02             |
| <b>miR-204</b>      | 0.08                                  | 217852_s_at     | ARL8B-ADP-ribosylation factor-like 8B                                           | 1.64        | -0.27                  | 3.06E-01             |
|                     |                                       | 213492_at       | SERP1-stress-associated endoplasmic reticulum protein 1                         | 1.80        | -0.57                  | 2.22E-02             |
| <b>miR-21</b>       | 20.92                                 | 218992_at       | <b>NFIB-nuclear factor I/B</b>                                                  | 0.43        | -0.75                  | 9.15E-04             |
|                     |                                       | 219060_at       |                                                                                 | 0.52        | -0.69                  | 3.28E-03             |
| <b>miR-7</b>        | 5.19                                  | 213492_at       | COL2A1-collagen, type II, alpha 1                                               | 0.51        | -0.12                  | 6.61E-01             |
|                     |                                       | 204359_at       | FLRT2-Fibronectin leucine rich transmembrane protein 2                          | 0.35        | -0.49                  | 5.36E-02             |
|                     |                                       | 206765_at       | KCNJ2-potassium inwardly-rectifying channel, subfamily J, member 2              | 0.33        | -0.73                  | 1.35E-03             |
|                     |                                       | 214112_s_at     | SNCA-synuclein, alpha                                                           | 0.48        | -0.54                  | 3.00E-02             |
|                     |                                       | 205022_s_at     | FOXN3-checkpoint repressor 1                                                    | 0.50        | -0.61                  | 1.22E-02             |
| <b>miR-93</b>       | 160.47                                | 210347_s_at     |                                                                                 | 0.27        | -0.75                  | 7.40E-04             |
|                     |                                       | 219497_s_at     | BCL11A-B-cell CLL/lymphoma 11A                                                  | 0.42        | -0.72                  | 1.51E-03             |
|                     |                                       | 219498_s_at     |                                                                                 | 0.43        | -0.71                  | 2.11E-03             |
|                     |                                       | 204753_s_at     |                                                                                 | 0.24        | -0.68                  | 3.60E-03             |
|                     |                                       | 204755_x_at     | HLF-hepatic leukemia factor                                                     | 0.28        | -0.81                  | 1.44E-04             |
|                     |                                       | 204754_at       |                                                                                 | 0.31        | -0.81                  | 1.49E-04             |
|                     |                                       | 218992_at       | <b>NFIB-nuclear factor I/B</b>                                                  | 0.43        | -0.74                  | 1.14E-03             |
|                     |                                       | 219060_at       |                                                                                 | 0.52        | -0.65                  | 6.30E-03             |
|                     |                                       | 203963_at       | RGL1-ral guanine nucleotide dissociation stimulator-like 1                      | 0.53        | -0.58                  | 1.79E-02             |
|                     |                                       | 204422_s_at     |                                                                                 | 0.36        | -0.69                  | 2.96E-03             |
| 205117_at           | TXNIP-thioredoxin interacting protein | 0.49            | -0.57                                                                           | 2.14E-02    |                        |                      |

Note: miRNA:target mRNA pairs that were tested in this study are indicated by shading, previously confirmed targets from the literature are indicated in **bold**, <sup>a</sup>p-value determined by Student's t-test.
